# Supplementary material for: Probing the surface-active sites of metal nanoclusters with atomic precision: a case study of Au5Ag11
Source: Royal Society of Chemistry journal article supplement (doi:10.1039/d3nr03288d), 2023-01-01
Supplement: d3nr03288d1.pdf [file d3nr03288d1.pdf]

## ***Supplementary Information***

### **Probing the Surface-Active Sites of Metal Nanoclusters with Atomic Precision: A Case Study of Au<sub>5</sub>Ag<sub>11</sub>**

Yaoyao Cao, Ying Xu, Honglei Shen, Peiyao Pan, Xuejuan Zou,\* Xi Kang,\* Manzhou Zhu\*

Department of Chemistry and Centre for Atomic Engineering of Advanced Materials, Key Laboratory of Structure and Functional Regulation of Hybrid Materials of Ministry of Education, Institutes of Physical Science and Information Technology and Anhui Province Key Laboratory of Chemistry for Inorganic/Organic Hybrid Functionalized Materials, Anhui University, Hefei, Anhui 230601, China.

E-mails of Corresponding Authors: z mz@ahu.edu.cn (M.Z.); kangxi\_chem@ahu.edu.cn (X.K.); 410139383@qq.com (X.Z.)

#### ***This Supporting Information includes:***

*Chemical Materials*

*Preparation*

*Characterization*

*Figures S1-S12*

*Tables S1-S3*

## Chemical Materials

All the following reagents were purchased from Sigma-Aldrich and used without further purification. Silver nitrate ( $\text{AgNO}_3$ , 99%), tetrachloroauric (III) acid ( $\text{HAuCl}_4 \cdot 4\text{H}_2\text{O}$ , 99% metal basis), cupric chloride ( $\text{CuCl}_2$ , 99% metals basis), bis(2-diphenylphosphinophenyl)ether (DPPOE, 98%), 2,6-dimethylbenzenethiol (HSPHMe<sub>2</sub>, 97%, DMBT), 2,6-dichlorobenzenethiol (HSPHCl<sub>2</sub>, 97%, DCBT), sodiumborohydride ( $\text{NaBH}_4$ , 99%), methanol (MeOH, HPLC grade), dichloromethane ( $\text{CH}_2\text{Cl}_2$ , HPLC grade), ethyl alcohol (EtOH, HPLC grade), n-hexane (HPLC grade), and toluene (Tol, HPLC grade).

## Preparation of $\text{Au}_5\text{Ag}_{11}(\text{SPhMe}_2)_8(\text{DPPOE})_2$

The preparation of  $\text{Au}_5\text{Ag}_9\text{Cu}_2(\text{SPhMe}_2)_8(\text{DPPOE})_2$  nanocluster was referred to the reported literature (*Angew. Chem. Int. Ed.*, 2022, **61**, e202205947).

## Preparation of Cu-SPhMe<sub>2</sub> complex

10 mg of  $\text{CuCl}_2$  was dissolved in methanol, and 50  $\mu\text{L}$  of 2,6-dimethylbenzenethiol was added under ultrasound. After 5 minutes, the product was washed with methanol several times and dried in the oven. The obtained product was dissolved in 5 mL of toluene for further use.

## Preparation of $\text{Au}_5\text{Ag}_9\text{Cu}_2(\text{SPhMe}_2)_8(\text{DPPOE})_2$

15 mg of  $\text{Au}_5\text{Ag}_{11}(\text{SPhMe}_2)_8(\text{DPPOE})_2$  crystals were dissolved in 10 mL of toluene, and the prepared Cu-SPhMe<sub>2</sub> complex solution was added to the solution at the rate of 25  $\mu\text{L}/\text{min}$ . After the addition of 175  $\mu\text{L}$  Cu-SPhMe<sub>2</sub> complex, the  $\text{Au}_5\text{Ag}_9\text{Cu}_2(\text{SPhMe}_2)_8(\text{DPPOE})_2$  nanocluster was obtained. The supernatant was then separated and washed several times with methanol. Black acicular single crystals were obtained via the dichloromethane/methanol two-phase diffusing crystallization method at room temperature.

## Preparation of $\text{Au}_5\text{Ag}_{11}(\text{SPhCl}_2)_8(\text{DPPOE})_2$

10 mg of  $\text{Au}_5\text{Ag}_{11}(\text{SPhMe}_2)_8(\text{DPPOE})_2$  crystals were dissolved in 5 mL of  $\text{CH}_2\text{Cl}_2$ , and 2,6-dichlorobenzenethiol (1 mg/mL in  $\text{CH}_2\text{Cl}_2$ ) was added to this solution with at the rate of 50  $\mu\text{L}/\text{min}$ . After 10 minutes, the  $\text{Au}_5\text{Ag}_{11}(\text{SPhMe}_2)_8(\text{DPPOE})_2$  nanocluster was obtained. The final supernatant was centrifugated and washed several times with methanol. Red cubical crystals were obtained by dichloromethane/methanol two-phase diffusing crystallization method at room temperature.

## Preparation of $\text{Au}_5\text{Ag}_{11}(\text{SPhMe}_2)_{8-x}(\text{SPhCl}_2)_x(\text{DPPOE})_2$

The preparation of  $\text{Au}_5\text{Ag}_{11}(\text{SPhMe}_2)_{8-x}(\text{SPhCl}_2)_x(\text{DPPOE})_2$  was similar to the operation method of the  $\text{Au}_5\text{Ag}_{11}(\text{SPhCl}_2)_8(\text{DPPOE})_2$  nanocluster, except that the addition of 2,6-dichlorobenzenethiol was suspended at 3 minutes (i.e., 150  $\mu\text{L}$  solution was added). Red cubical crystals of  $\text{Au}_5\text{Ag}_{11}(\text{SPhMe}_2)_{8-x}(\text{SPhCl}_2)_x(\text{DPPOE})_2$  were obtained by dichloromethane/methanol two-phase diffusing crystallization method at room temperature.

## Characterization

The UV-vis absorption spectra of the nanoclusters were recorded using an Agilent 8453. Photoluminescence (PL) spectra were measured on a Horiba Fluoro max plus spectrophotometer with the same optical density of 0.1.

Electrospray ionization mass (ESI-MS) measurements were performed on Waters XEVO G2-XS QT of the mass spectrometer. The sample was directly infused into the chamber at 5  $\mu\text{l}/\text{min}$ . For preparing the ESI samples, the crystals were dissolved in  $\text{CH}_2\text{Cl}_2$  (1 mg/mL) and diluted (v/v=1:1) by  $\text{CH}_3\text{OH}$ .

#### **Single crystal X-ray diffraction (SC-XRD)**

The data collection was carried out on a Stoe Stadivari diffractometer under liquid nitrogen flow at 120 K, using graphite-monochromatized Cu K $\alpha$  radiation ( $\lambda = 1.54186 \text{ \AA}$ ). Data reductions and absorption corrections were performed using the SAINT and SADABS programs, respectively. The structure was solved by direct methods and refined with full-matrix least squares on  $F^2$  using the SHELXTL software package. All non-hydrogen atoms were refined anisotropically, and all the hydrogen atoms were set in geometrically calculated positions and refined isotropically using a riding model.

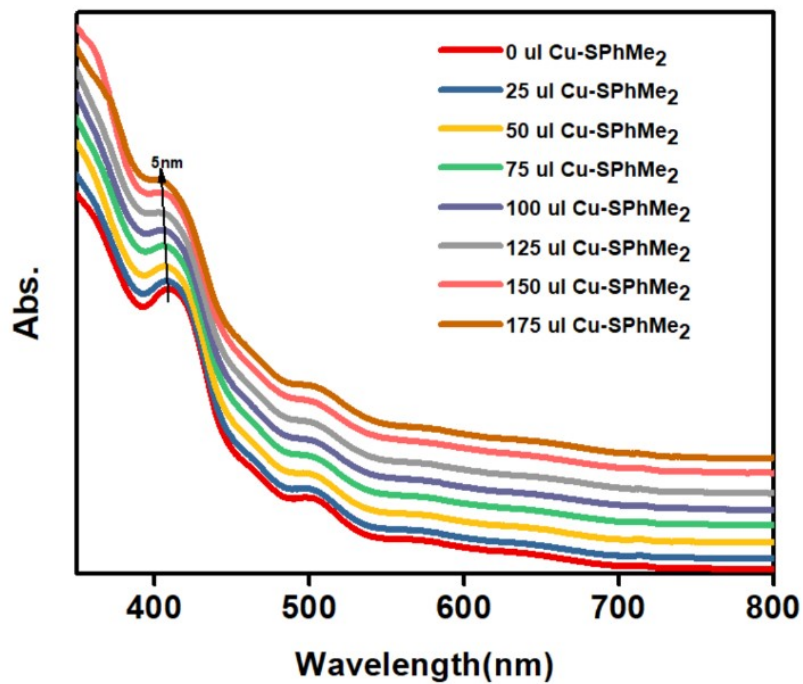

**Figure S1.** Time-dependent optical absorption spectra during the metal-exchange (Cu alloying) reaction beginning from  $\text{Au}_5\text{Ag}_9\text{-DMBT}$ .

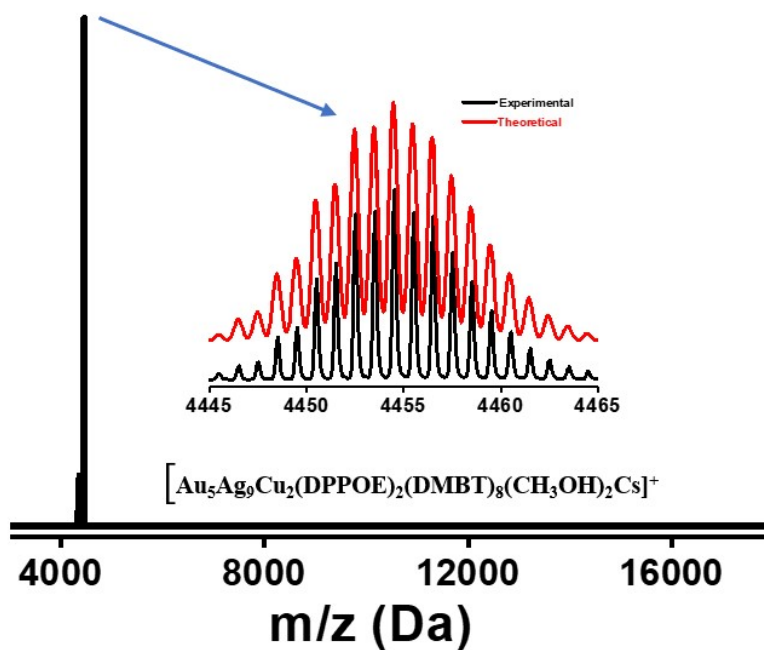

**Figure S2.** ESI-MS result of the  $\text{Au}_5\text{Ag}_9\text{Cu}_2\text{-DMBT}$  nanocluster.

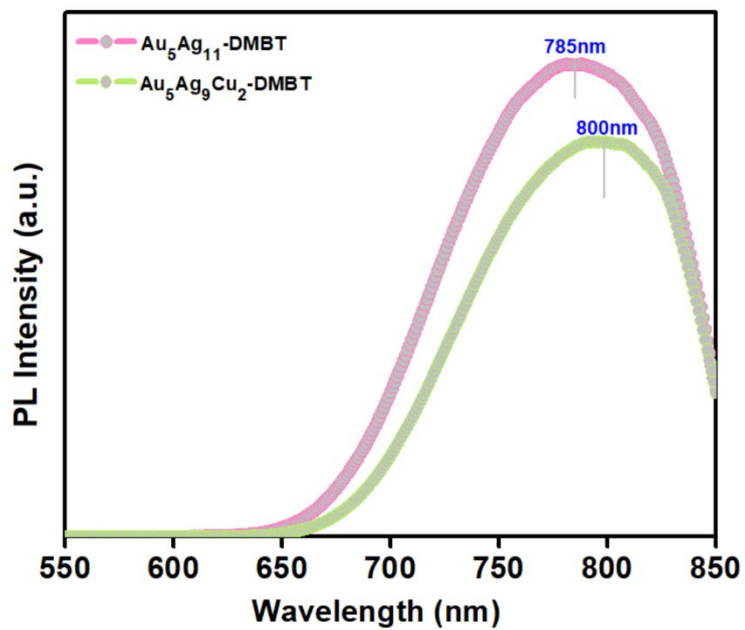

Figure S3. PL comparison between Au<sub>5</sub>Ag<sub>11</sub>-DMBT and Au<sub>5</sub>Ag<sub>9</sub>Cu<sub>2</sub>-DMBT nanoclusters (dissolved in toluene).

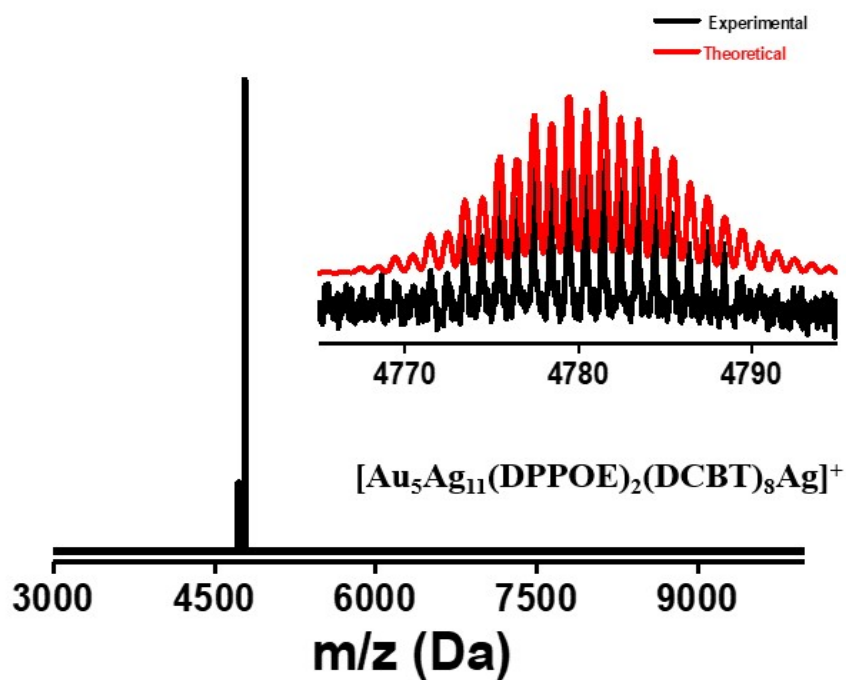

Figure S4. ESI-MS result of the Au<sub>5</sub>Ag<sub>11</sub>-DCBT nanocluster.

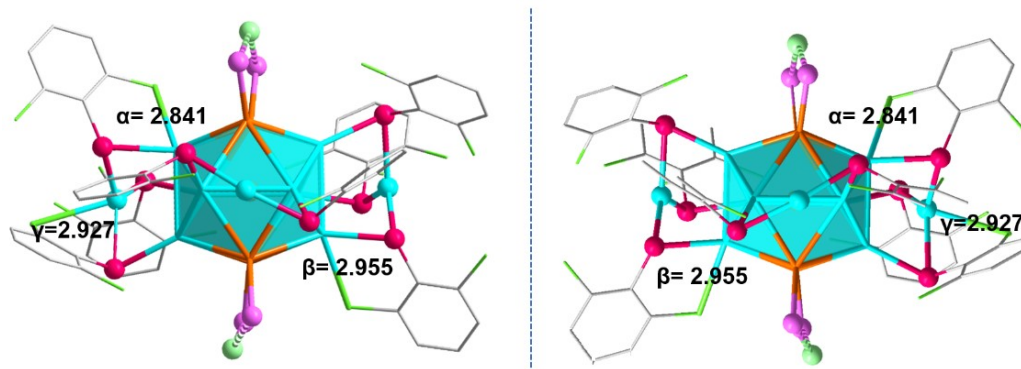

Figure S5. The three Ag-Cl bonds in a pair of enantiomer structures of  $\text{Au}_5\text{Ag}_{11}\text{-DCBT}$ .

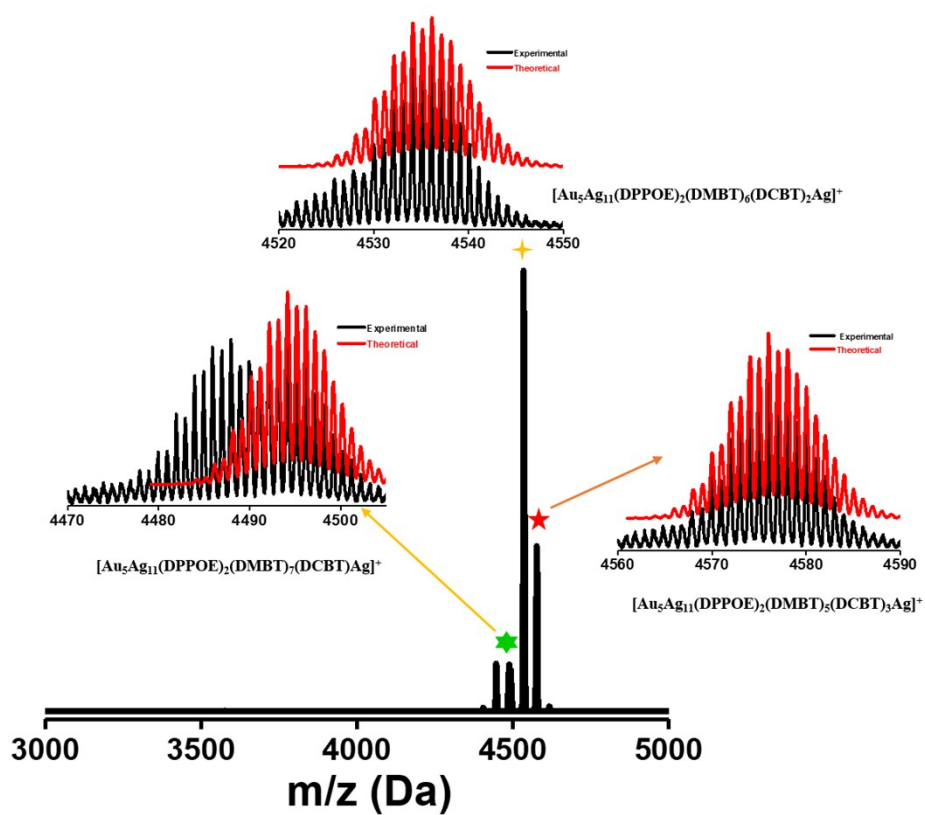

Figure S6. The ESI-MS results of the  $\text{Au}_5\text{Ag}_{11}(\text{DMBT})_{8-x}(\text{DCBT})_x(\text{DPPOE})_2$  ( $x = 1, 2,$  and  $3$ ) nanocluster.

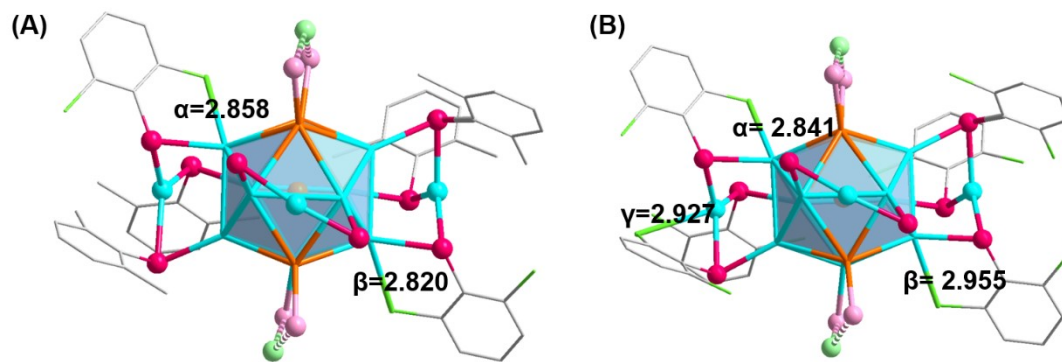

Figure S7. The Ag-Cl bonds in (A)  $\text{Au}_5\text{Ag}_{11}\text{-DMBT-DCBT}$  and (B)  $\text{Au}_5\text{Ag}_{11}\text{-DCBT}$  nanoclusters.

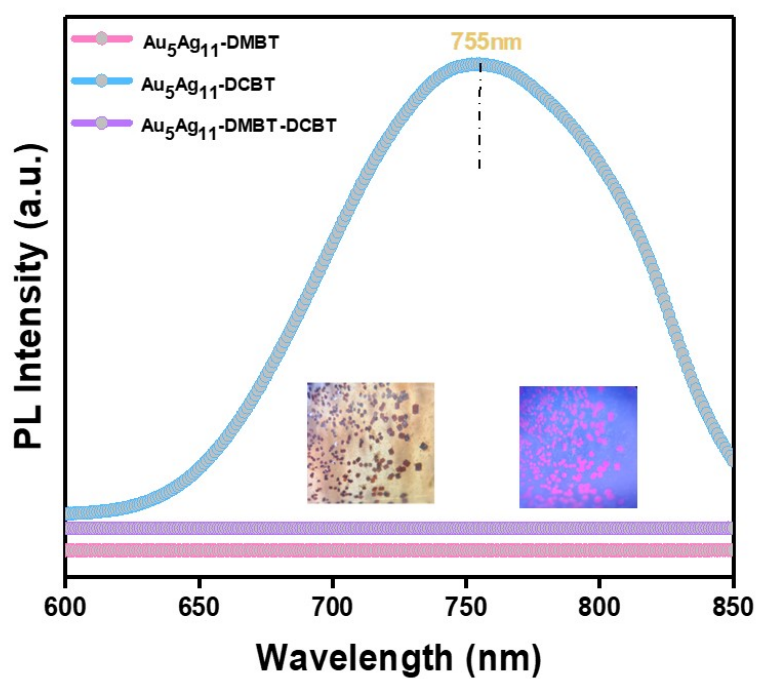

Figure S8. The crystal fluorescence characteristic of  $\text{Au}_5\text{Ag}_{11}\text{-DCBT}$ ,  $\text{Au}_5\text{Ag}_{11}\text{-DMBT-DCBT}$ , and  $\text{Au}_5\text{Ag}_{11}\text{-DMBT}$  nanoclusters.

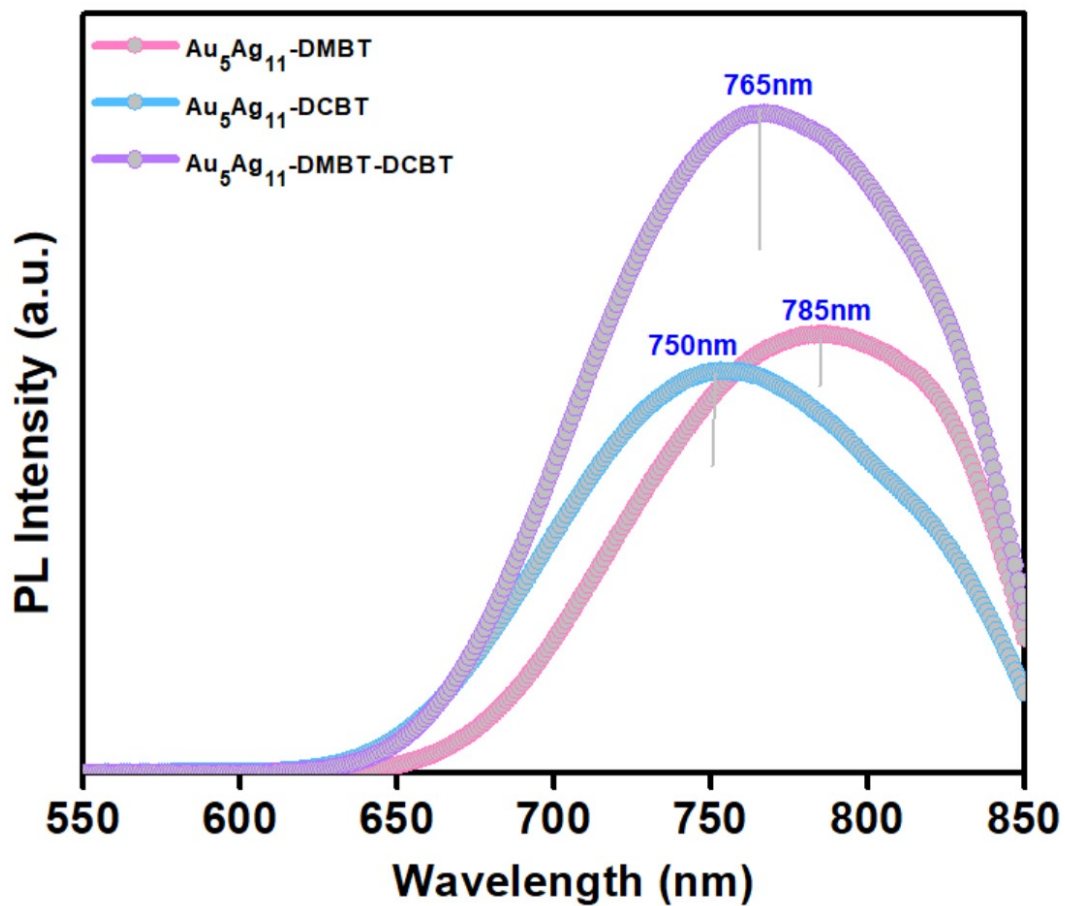

Figure S9. PL properties comparison among Au<sub>5</sub>Ag<sub>11</sub>-DCBT, Au<sub>5</sub>Ag<sub>11</sub>-DMBT-DCBT, and Au<sub>5</sub>Ag<sub>11</sub>-DMBT in toluene.

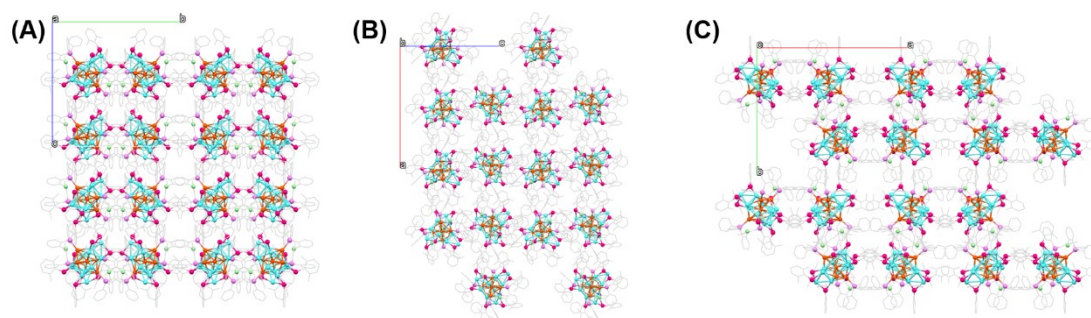

Figure S10. Stacking patterns of Au<sub>5</sub>Ag<sub>11</sub>-DMBT in the crystal lattice along *a*, *b*, and *c* axis.



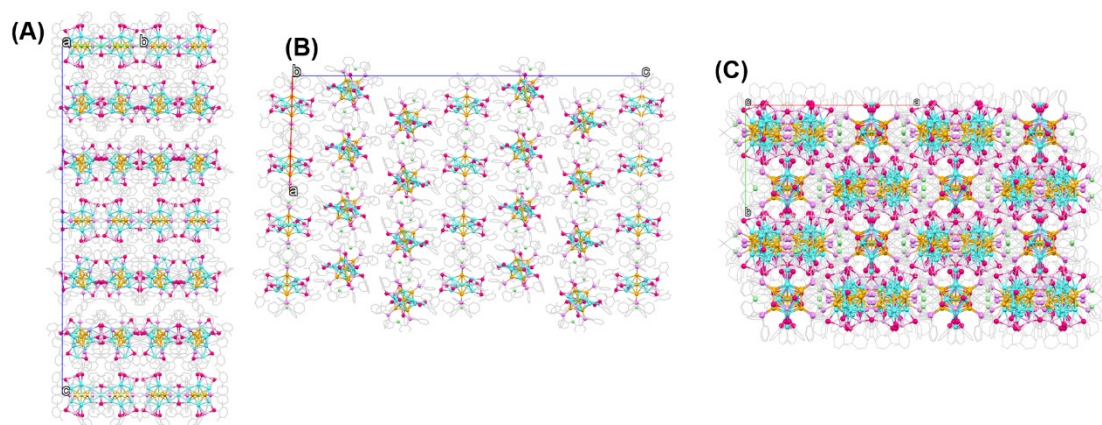

**Figure S11.** Stacking patterns of  $\text{Au}_5\text{Ag}_9\text{Cu}_2\text{-DMBT}$  in the crystal lattice along  $a$ ,  $b$ , and  $c$  axis.

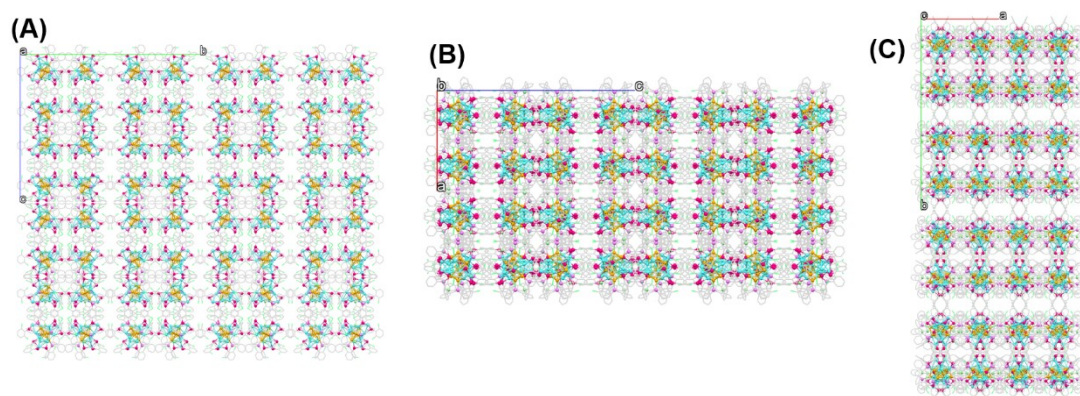

**Figure S12.** Stacking patterns of  $\text{Au}_5\text{Ag}_{11}\text{-DCBT}$  in the crystal lattice along  $a$ ,  $b$ , and  $c$  axis.

**Table S1.** Crystal data and structure refinement for the Au<sub>5</sub>Ag<sub>9</sub>Cu<sub>2</sub>(SPhMe<sub>2</sub>)<sub>8</sub>(DPPOE)<sub>2</sub> nanocluster.

|                                                            |                                                                                                                                |
|------------------------------------------------------------|--------------------------------------------------------------------------------------------------------------------------------|
| Empirical formula                                          | C <sub>136</sub> H <sub>128</sub> Ag <sub>9</sub> Au <sub>5</sub> Cu <sub>2</sub> O <sub>2</sub> P <sub>4</sub> S <sub>8</sub> |
| Formula weight                                             | 4257.48                                                                                                                        |
| Temperature/K                                              | 120                                                                                                                            |
| Crystal system                                             | monoclinic                                                                                                                     |
| Space group                                                | <i>I</i> 2/ <i>a</i>                                                                                                           |
| <i>a</i> /Å                                                | 28.0881(3)                                                                                                                     |
| <i>b</i> /Å                                                | 18.3857(2)                                                                                                                     |
| <i>c</i> /Å                                                | 82.4807(10)                                                                                                                    |
| $\alpha$ /°                                                | 90                                                                                                                             |
| $\beta$ /°                                                 | 91.5410(10)                                                                                                                    |
| $\gamma$ /°                                                | 90                                                                                                                             |
| Volume/Å <sup>3</sup>                                      | 42579.2(8)                                                                                                                     |
| Z                                                          | 12                                                                                                                             |
| $\rho_{\text{calc}}$ /cm <sup>3</sup>                      | 1.992                                                                                                                          |
| $\mu$ /mm <sup>-1</sup>                                    | 21.347                                                                                                                         |
| F(000)                                                     | 24288.0                                                                                                                        |
| Radiation                                                  | CuK $\alpha$ ( $\lambda$ = 1.54186)                                                                                            |
| 2 $\theta$ range for data collection/°                     | 8.018 to 139.282                                                                                                               |
| Index ranges                                               | -33 $\leq$ <i>h</i> $\leq$ 29, -22 $\leq$ <i>k</i> $\leq$ 20, -100 $\leq$ <i>l</i> $\leq$ 64                                   |
| Reflections collected                                      | 196619                                                                                                                         |
| Independent reflections                                    | 39370 [ <i>R</i> <sub>int</sub> = 0.0905, <i>R</i> <sub>sigma</sub> = 0.1024]                                                  |
| Data/restraints/parameters                                 | 39370/2448/2183                                                                                                                |
| Goodness-of-fit on F <sup>2</sup>                          | 0.821                                                                                                                          |
| Final R indexes [ <i>I</i> $\geq$ 2 $\sigma$ ( <i>I</i> )] | <i>R</i> <sub>1</sub> = 0.0423, <i>wR</i> <sub>2</sub> = 0.0892                                                                |
| Final R indexes [all data]                                 | <i>R</i> <sub>1</sub> = 0.0753, <i>wR</i> <sub>2</sub> = 0.0952                                                                |
| Largest diff. peak/hole / e Å <sup>-3</sup>                | 1.66/-1.08                                                                                                                     |

**Table S2.** Crystal data and structure refinement for the Au<sub>5</sub>Ag<sub>11</sub>(SPhCl<sub>2</sub>)<sub>8</sub>(DPPOE)<sub>2</sub> nanocluster.

|                                             |                                                                                                                                       |
|---------------------------------------------|---------------------------------------------------------------------------------------------------------------------------------------|
| Empirical formula                           | C <sub>120</sub> H <sub>80</sub> Ag <sub>11.27</sub> Au <sub>4.73</sub> Cl <sub>16</sub> O <sub>2</sub> P <sub>4</sub> S <sub>8</sub> |
| Formula weight                              | 4648.91                                                                                                                               |
| Temperature/K                               | 120                                                                                                                                   |
| Crystal system                              | orthorhombic                                                                                                                          |
| Space group                                 | <i>Ccca</i>                                                                                                                           |
| a/Å                                         | 23.4047(7)                                                                                                                            |
| b/Å                                         | 56.3203(16)                                                                                                                           |
| c/Å                                         | 46.1622(18)                                                                                                                           |
| α/°                                         | 90                                                                                                                                    |
| β/°                                         | 90                                                                                                                                    |
| γ/°                                         | 90                                                                                                                                    |
| Volume/Å <sup>3</sup>                       | 60849(3)                                                                                                                              |
| Z                                           | 16                                                                                                                                    |
| ρ <sub>calc</sub> /cm <sup>3</sup>          | 2.030                                                                                                                                 |
| μ/mm <sup>-1</sup>                          | 24.022                                                                                                                                |
| F(000)                                      | 34871.0                                                                                                                               |
| Radiation                                   | CuKα (λ = 1.54186)                                                                                                                    |
| 2θ range for data collection/°              | 7.052 to 125                                                                                                                          |
| Index ranges                                | -20 ≤ h ≤ 26, -64 ≤ k ≤ 49, -49 ≤ l ≤ 53                                                                                              |
| Reflections collected                       | 74458                                                                                                                                 |
| Independent reflections                     | 23986 [R <sub>int</sub> = 0.1084, R <sub>sigma</sub> = 0.1119]                                                                        |
| Data/restraints/parameters                  | 23986/1440/1256                                                                                                                       |
| Goodness-of-fit on F <sup>2</sup>           | 1.041                                                                                                                                 |
| Final R indexes [I ≥ 2σ (I)]                | R <sub>1</sub> = 0.1193, wR <sub>2</sub> = 0.3143                                                                                     |
| Final R indexes [all data]                  | R <sub>1</sub> = 0.1605, wR <sub>2</sub> = 0.3458                                                                                     |
| Largest diff. peak/hole / e Å <sup>-3</sup> | 2.27/-1.94                                                                                                                            |

**Table S3.** Crystal data and structure refinement for the Au<sub>5</sub>Ag<sub>11</sub>(SPhMe<sub>2</sub>)<sub>6</sub>(SPhCl<sub>2</sub>)<sub>2</sub>(DPPOE)<sub>2</sub> nanocluster.

|                                             |                                                                                                                                          |
|---------------------------------------------|------------------------------------------------------------------------------------------------------------------------------------------|
| Empirical formula                           | C <sub>127.66</sub> H <sub>110.72</sub> Ag <sub>11</sub> Au <sub>5</sub> Cl <sub>5.34</sub> O <sub>2</sub> P <sub>4</sub> S <sub>8</sub> |
| Formula weight                              | 4417.98                                                                                                                                  |
| Temperature/K                               | 120                                                                                                                                      |
| Crystal system                              | triclinic                                                                                                                                |
| Space group                                 | <i>P</i> -1                                                                                                                              |
| a/Å                                         | 15.839(2)                                                                                                                                |
| b/Å                                         | 21.943(3)                                                                                                                                |
| c/Å                                         | 23.474(2)                                                                                                                                |
| α/°                                         | 87.071(9)                                                                                                                                |
| β/°                                         | 83.398(9)                                                                                                                                |
| γ/°                                         | 78.741(10)                                                                                                                               |
| Volume/Å <sup>3</sup>                       | 7944.8(16)                                                                                                                               |
| Z                                           | 2                                                                                                                                        |
| ρ <sub>calc</sub> /cm <sup>3</sup>          | 1.847                                                                                                                                    |
| μ/mm <sup>-1</sup>                          | 21.536                                                                                                                                   |
| F(000)                                      | 4167.0                                                                                                                                   |
| Radiation                                   | CuKα (λ = 1.54186)                                                                                                                       |
| 2θ range for data collection/°              | 11.46 to 124.994                                                                                                                         |
| Index ranges                                | -11 ≤ h ≤ 18, -25 ≤ k ≤ 25, -22 ≤ l ≤ 27                                                                                                 |
| Reflections collected                       | 66857                                                                                                                                    |
| Independent reflections                     | 24655 [R <sub>int</sub> = 0.0618, R <sub>sigma</sub> = 0.0837]                                                                           |
| Data/restraints/parameters                  | 24655/1633/1490                                                                                                                          |
| Goodness-of-fit on F <sup>2</sup>           | 0.925                                                                                                                                    |
| Final R indexes [I ≥ 2σ (I)]                | R <sub>1</sub> = 0.0656, wR <sub>2</sub> = 0.1686                                                                                        |
| Final R indexes [all data]                  | R <sub>1</sub> = 0.0914, wR <sub>2</sub> = 0.1810                                                                                        |
| Largest diff. peak/hole / e Å <sup>-3</sup> | 2.70/-2.71                                                                                                                               |
